# Supplementary material
Source: ML conference proceedings conference paper supplement (https://proceedings.neurips.cc/paper_files/paper/2021/hash/93a27b0bd99bac3e68a440b48aa421ab-Abstract.html)
Supplement: Supplementary file 1 [file 93a27b0bd99bac3e68a440b48aa421ab-Supplemental.pdf]

---

# Moser Flow: Divergence-based Generative Modeling on Manifolds Supplementary

---

Noam Rozen<sup>1</sup>      Aditya Grover<sup>2,3</sup>      Maximilian Nickel<sup>2</sup>      Yaron Lipman<sup>1,2</sup>

<sup>1</sup>Weizmann Institute of Science    <sup>2</sup>Facebook AI Research    <sup>3</sup>UCLA

## A Proof of Moser’s Theorem.

We will review here the proof of Moser Theorem 1; for more details see Moser’s original paper (Moser, 1965) or Lang (2012), Chapter 18 section 2. Let  $\hat{\alpha}_t = \alpha_t dV$  be the time-dependent volume form over  $\mathcal{M}$  corresponding to the density interpolant  $\alpha_t$ . Note that  $\int_{\mathcal{M}} \hat{\alpha}_t = 1$ . Moser’s idea is to replace equation 2 with its continuous version:

$$\hat{\alpha}_0 = \Phi_t^* \hat{\alpha}_t, \quad t \in [0, 1] \tag{A1}$$

If equation A1 holds for all  $t \in [0, 1]$  then plugging  $t = 1$  leads to equation 2. Since equation A1 holds trivially for  $t = 0$  (since  $\Phi_0$  is the identity mapping), solving it amounts to asking that  $\Phi_t^* \hat{\alpha}_t$  is constant, i.e.,

$$\frac{d}{dt} \Phi_t^* \hat{\alpha}_t = 0. \tag{A2}$$

The time derivative of  $\Phi_t^* \hat{\alpha}_t$  can be computed with the help of the Lie derivative (e.g., Proposition 5.2 in Lang (2012)): If  $\Phi_t$  is the flow corresponding to the time dependent vector field  $v_t$  (see equation 3), and  $\omega$  is a differential form then

$$\frac{d}{dt} (\Phi_t^* \omega) = \Phi_t^* (\mathfrak{L}_{v_t} \omega),$$

where  $\mathfrak{L}$  denotes the Lie derivative. The Lie derivative  $\mathfrak{L}_v \omega$  of a smooth vector field  $v$  and smooth differential form  $\omega$  can be computed using Cartan’s "magic formula" (see e.g., Theorem 14.35 in Lee (2013)):

$$\mathfrak{L}_v \omega = i_v(d\omega) + d(i_v \omega),$$

where  $i_v \omega$  is the interior multiplication of a vector field and a differential form defined by  $(i_v \omega)(v_2, \dots, v_n) = \omega(v, v_2, \dots, v_n)$ . In case  $\omega$  is an  $n$ -form (as  $\hat{\alpha}_t$  in our case) we have  $d\omega = 0$  so the first term in the r.h.s. above vanishes. Lastly, we will need the following "trick":

$$\frac{d}{dt} (\Phi_t^* \hat{\alpha}_t) = \frac{d}{ds} \Big|_{s=t} (\Phi_s^* \hat{\alpha}_t) + \frac{d}{ds} \Big|_{s=t} (\Phi_t^* \hat{\alpha}_s).$$

Putting the last three equations together we get:

$$\frac{d}{dt} (\Phi_t^* \hat{\alpha}_t) = \Phi_t^* (\mathfrak{L}_{v_t} \hat{\alpha}_t) + \Phi_t^* \left( \frac{d}{dt} \hat{\alpha}_t \right) = \Phi_t^* \left( d(i_{v_t} \hat{\alpha}_t) + \frac{d}{dt} \hat{\alpha}_t \right). \tag{A3}$$

The theorem is proven if one can show that  $v_t \in \mathfrak{X}(\mathcal{M})$  exists such that  $d(i_{v_t} \hat{\alpha}_t) + \frac{d}{dt} \hat{\alpha}_t = 0$ . The divergence operator is defined by the equality  $d(i_w dV) = \text{div}(w) dV$ , for a vector field  $w \in \mathfrak{X}(\mathcal{M})$ . Therefore  $d(i_{v_t} \hat{\alpha}_t) = \text{div}(\alpha_t v_t) dV$ . Denote  $\hat{\gamma}_t = \frac{d}{dt} \hat{\alpha}_t$ . Then we need to show that  $v_t \in \mathcal{M}$  exists such that

$$d(i_{v_t} \hat{\alpha}_t) + \hat{\gamma}_t = 0. \tag{A4}$$

By the Hodge decomposition (see Theorem 4.18 in Morita (2001))  $\hat{\gamma}_t$  can be written as a sum of an exact and harmonic forms:  $\hat{\gamma}_t = d\hat{\beta}_t + \hat{h}_t$ . Since every harmonic form on a connected, compact,

oriented Riemannian manifold is a constant multiple of the Riemannian volume form,  $cdV$  (see Corollary 4.14 in Morita (2001)), we have

$$0 = \frac{d}{dt}1 = \frac{d}{dt} \int_{\mathcal{M}} \hat{\alpha}_t = \int_{\mathcal{M}} \hat{\gamma}_t = \int_{\mathcal{M}} d\hat{\beta}_t + \int_{\mathcal{M}} \hat{h}_t = \int_{\mathcal{M}} \hat{h}_t = c \int_{\mathcal{M}} dV,$$

where in the second from the right equality we used Stokes Theorem (see e.g., Theorem 16.11 in Lee (2013)) and the fact that  $\mathcal{M}$  has no boundary. This implies that  $c = 0$ , and

$$\hat{\gamma}_t = d\hat{\beta}_t. \quad (\text{A5})$$

Using the correspondence between vector fields and  $d - 1$  forms we let  $\beta_t = i_{u_t}dV$ , where  $u_t \in \mathfrak{X}(\mathcal{M})$ , and  $d\beta_t = d(i_{u_t}dV) = \text{div}(u_t)dV$ .

Lastly, consider  $v_t$  defined as follows:

$$v_t = -\frac{u_t}{\alpha_t}. \quad (\text{A6})$$

With this choice equation A4 is satisfied:

$$d(i_{v_t}\hat{\alpha}_t) + \hat{\gamma}_t = -d(i_{\frac{u_t}{\alpha_t}}(\alpha_t dV)) + i_{u_t}dV = 0.$$

The theorem is proven.  $\square$

One comment is that for practically finding  $v_t$ , according to equation A6, we need to get  $u_t$ , which amounts to solving the Hodge decomposition equation,  $\text{div}(u_t)dV = \hat{\gamma}_t$ , that is equivalent to the following PDE on the manifold  $\mathcal{M}$ :

$$\text{div}(u_t) = \frac{d}{dt}\alpha_t. \quad (\text{A7})$$

*Proof of Lemma 1.* The proof uses Stokes theorem:

$$\int_{\mathcal{M}} \text{div}(u)dV = \int_{\mathcal{M}} d(i_u dV) = \int_{\partial\mathcal{M}} i_u dV = 0,$$

where the last equality is due to the fact that either  $\partial\mathcal{M} = \emptyset$ , or, for  $x \in \partial\mathcal{M}$ , we have that  $u(x) \in T_x\partial\mathcal{M}$ , and therefore  $(i_u dV)(v_1, \dots, v_{n-1}) = dV(u, v_1, \dots, v_{n-1}) = 0$ , for all  $v_1, \dots, v_{n-1} \in T_x\partial\mathcal{M}$ . This implies  $i_u dV = 0$ .  $\square$

## B Other proofs

*Proof of Theorem 2.* As we showed in the paper, our loss can be equivalently presented (up to constant factors) as

$$l(\theta) = D(\mu, \bar{\mu}_+) + (\lambda - 1) \int_{\mathcal{M}} \bar{\mu}_- dV$$

Where the first term  $D(\mu, \bar{\mu}_+)$  is the generalized KL divergence which is non-negative and equals zero iff  $\bar{\mu}_+ = \mu$  and since  $\lambda \geq 1$  the second term is also non-negative and equals zero iff  $\mu_- = 0$  or  $\lambda = 1$ .

First we show that  $\bar{\mu} = \mu$  is a minimizer of the loss. Since we assumed  $\mu \geq \epsilon$  we have that  $\bar{\mu}_+ = \max(\mu, \epsilon) = \mu$  and  $\bar{\mu}_- = \bar{\mu}_+ - \bar{\mu} = 0$ . So both  $D(\mu, \bar{\mu}_+)$  and  $\int_{\mathcal{M}} \bar{\mu}_- dV$  are minimized, which means the entire loss is minimized.

Now let's assume  $\bar{\mu}$  is a minimizer of the loss. If  $\lambda > 1$   $\bar{\mu}$  has to minimize both terms, as we know there exists a minimizer that minimizes both of them. In particular for any  $\lambda \geq 1$  we have that  $\bar{\mu}$  minimizes  $D(\mu, \bar{\mu}_+)$  meaning  $\bar{\mu}_+ = \mu$ . Now we have that  $0 = 1 - 1 = \int_{\mathcal{M}} \bar{\mu} dV - \int_{\mathcal{M}} \mu dV = \int_{\mathcal{M}} \bar{\mu}_+ dV + \int_{\mathcal{M}} \bar{\mu}_- dV - \int_{\mathcal{M}} \mu dV = \int_{\mathcal{M}} \bar{\mu}_- dV$ . So we get that  $\mu_- = 0$ . Finally  $\bar{\mu} = \bar{\mu}_+ + \bar{\mu}_- = \mu + 0 = \mu$ .  $\square$

*Proof of Lemma 2.* Proposition 1.2 in Lang (2012) and Definition 1 in Section 4-4 in Do Carmo (2016) imply that for submanifolds with induced metric the Riemannian covariant derivative at  $x \in \mathcal{M}$  satisfies  $\nabla_{e_i} u = P_x \frac{\partial u}{\partial e_i}$ , where  $P_x$  is the projection matrix on  $T_x\mathcal{M}$  introduced above.

Then, denoting  $e_1, \dots, e_n, n_1, \dots, n_k$  an orthonormal basis of  $\mathbb{R}^d$  where the first  $n$  vectors span  $T_x\mathcal{M}$  and the latter  $k$  span  $N_x\mathcal{M}$ :

$$\begin{aligned} \operatorname{div}(\mathbf{u}) &= \sum_{i=1}^n \langle \nabla_{e_i} \mathbf{u}, e_i \rangle_g = \sum_{i=1}^n \left\langle \mathbf{P}_x \frac{\partial \mathbf{u}}{\partial e_i}, e_i \right\rangle = \sum_{i=1}^n \left\langle \frac{\partial \mathbf{u}}{\partial e_i}, \mathbf{P}_x e_i \right\rangle = \sum_{i=1}^n \left\langle \frac{\partial \mathbf{u}}{\partial e_i}, e_i \right\rangle \\ &= \sum_{i=1}^n \left\langle \frac{\partial \mathbf{u}}{\partial e_i}, e_i \right\rangle + \sum_{j=1}^k \left\langle \frac{\partial \mathbf{u}}{\partial n_j}, n_j \right\rangle = \operatorname{div}_E(\mathbf{u}), \end{aligned}$$

□

*Proof of Theorem 3.* From Theorem 6.24 in Lee (2013) there exists a neighbourhood  $\Omega \subset \mathbb{R}^d$  of  $\mathcal{M}$  such that the projection  $\pi : \Omega \rightarrow \mathcal{M}$  is smooth over  $\bar{\Omega}$  (i.e., can be extended to a smooth function over a neighborhood of  $\bar{\Omega}$ ). Since  $\mathcal{M}$  is compact,  $\bar{\Omega}$  is also compact. According to Theorem 1 there exists a vector field  $\mathbf{u}^* \in \mathfrak{X}(\mathcal{M})$  so that  $\mu = \nu - \operatorname{div}(\mathbf{u}^*)$ . We extend  $\mathbf{u}^*$  to  $\bar{\Omega}$  by setting  $\mathbf{u}^*(x) = \mathbf{u}^*(\pi(x))$ , for  $x \notin \mathcal{M}$ . Note that for  $x \in \mathcal{M}$  this definition coincides with the former  $\mathbf{u}^*$  defined over  $\mathcal{M}$ . Similarly to equation 18 we have that  $\mathbf{u}^*(x) = \mathbf{P}_{\pi(x)} \mathbf{u}^*(\pi(x))$ .

Corollary 3.4 in Hornik et al. (1990) shows that given a target smooth function  $f : \bar{\Omega} \rightarrow \mathbb{R}$  and  $\epsilon > 0$ , there exists an MLP with  $l$ -finite smooth activation that uniformly approximate the first  $0 \leq m \leq l$  derivatives of  $f$  over  $\bar{\Omega}$  with error at most  $\epsilon$ . An activation  $\sigma : \mathbb{R} \rightarrow \mathbb{R}$  is  $l$ -finite if it is  $l$ -times continuously differentiable and satisfies  $0 < \int_{-\infty}^{\infty} |\sigma^{(l)}| < \infty$ . Note that sigmoid and tanh are  $l$ -finite for all  $l \geq 1$ , and Softplus is  $l$ -finite for  $l \geq 2$ .

Using this approximation result (adapted to vector valued MLP) there exists an MLP  $\mathbf{v}_\theta : \mathbb{R}^d \rightarrow \mathbb{R}^d$  such that each coordinate of  $\mathbf{u}^*$  and  $\mathbf{v}_\theta$  are  $\epsilon$  close in value and first partial derivatives over  $\bar{\Omega}$ .

Now for arbitrary  $x \in \mathcal{M}$  we have

$$\begin{aligned} \bar{\mu}(x) &= \nu(x) - \operatorname{div}_E(\mathbf{P}_{\pi(x)} \mathbf{v}_\theta(\pi(x))) \\ &= \nu(x) - \operatorname{div}_E(\mathbf{P}_{\pi(x)} \mathbf{v}_\theta(\pi(x)) - \mathbf{P}_{\pi(x)} \mathbf{u}^*(\pi(x))) - \operatorname{div}(\mathbf{u}^*(x)) \\ &= \mu(x) - \operatorname{div}_E(\mathbf{P}_{\pi(x)} [\mathbf{v}_\theta(\pi(x)) - \mathbf{u}^*(\pi(x))]) \\ &= \mu(x) - \operatorname{div}_E(\mathbf{P}_{\pi(x)} \mathbf{e}(x)), \end{aligned}$$

where we denote  $\mathbf{e}(x) = \mathbf{v}_\theta(\pi(x)) - \mathbf{u}^*(\pi(x))$ . We will finish the proof by showing that

$$\left| \operatorname{div}_E(\mathbf{P}_{\pi(x)} \mathbf{e}(x)) \right| < c\epsilon$$

for some constant  $c > 0$  depending only on  $\mathcal{M}$ . Note that the l.h.s. of this equation is a sum of terms of the form  $\frac{\partial}{\partial x^i} ((\mathbf{P}_{\pi(x)})_{i,j} \mathbf{e}(x)_j)$ , where  $(\mathbf{P}_{\pi(x)})_{i,j}$  is the  $(i, j)$ -th entry of the matrix  $\mathbf{P}_{\pi(x)}$  and  $\mathbf{e}(x)_j$  is the  $j$ -th entry of  $\mathbf{e}(x)$ . Since the value and first partial derivatives of  $\pi$  and  $\mathbf{P}$  (as the differential of  $\pi$ ) over  $\mathcal{M}$  can be bounded, depending only on  $\mathcal{M}$ , the theorem is proved.

□

## C Laplacian eigen function calculation

Given a triangular surface mesh  $\mathcal{M}'$ , we wish to calculate the  $k$ -th eigenfunction of the (discrete) Laplace-Beltrami operator over  $\mathcal{M}'$ . We will use the standard (cotangent) discretization of the Laplacian over meshes (Botsch et al., 2010). That is, we define  $\mathbf{L}$  to be the cotangent-Laplacian matrix of the graph defined by  $\mathcal{M}'$ , and  $\mathbf{M}$  the mass matrix of  $\mathcal{M}'$ , i.e., a diagonal matrix where  $M_{ii}$  is the area of the Voroni cell of the  $i$ -th vertex in the mesh. We then calculate the eigenfunctions as the solution to the generalized eigenvalue problem  $\mathbf{L}\mathbf{x} = \lambda_k \mathbf{M}\mathbf{x}$  where  $\lambda_k$  is the  $k$ -th eigenvalue. We sample these  $\mathcal{M}'$  piecewise-linear functions at centroids of faces.

## D Linearization of the projection operator $\pi$

Since we only sample and derivate the projection operator  $\pi : \mathbb{R}^d \rightarrow \mathcal{M}$  over  $\mathcal{M}$ , implementing equation 18 does not require knowledge of the full projection  $\pi$ . Rather, it is enough to use its first

order expansion over  $\mathcal{M}$ . For  $\mathbf{x}_0 \in \mathcal{M}$

$$\pi(\mathbf{x}) \approx \pi(\mathbf{x}_0) + \mathbf{P}_{\mathbf{x}_0}(\mathbf{x} - \mathbf{x}_0) = \mathbf{x}_0 + \mathbf{P}_{\mathbf{x}_0}(\mathbf{x} - \mathbf{x}_0) = \hat{\pi}(\mathbf{x}_0, \mathbf{x}).$$

Now since  $\pi(\cdot)$  and  $\hat{\pi}(\mathbf{x}_0, \cdot)$  have the same value and first partial derivatives at  $\mathbf{x}_0$  we can replace equation 18 for each sample point  $\mathbf{x}_0 \in \mathcal{X} \cup \mathcal{Y}$ , with

$$\mathbf{u}(\mathbf{x}) = \mathbf{P}_{\hat{\pi}(\mathbf{x}_0, \mathbf{x})} \mathbf{v}_\theta(\hat{\pi}(\mathbf{x}_0, \mathbf{x})).$$

## E Unnormalized densities

As described in section 4, our formulation of the loss is dependent on knowing the volume of the manifold  $\mathcal{M}$ . For simple cases like the flat torus or the sphere, we have a closed form formula for this volume. For more general cases, we can show that we don't actually require to know this value, since we can work with unnormalized density functions:

$$\begin{aligned} \ell(\theta) &= -\frac{1}{m} \sum_{i=1}^m \log \max \{ \epsilon, \nu(\mathbf{x}_i) - \text{div}_E \mathbf{u}(\mathbf{x}_i) \} \\ &\quad + \frac{V(\mathcal{M})\lambda_-}{l} \sum_{j=1}^l \left( \epsilon - \min \{ \epsilon, \nu(\mathbf{y}_j) - \text{div}_E \mathbf{u}(\mathbf{y}_j) \} \right), \\ &= \log V(\mathcal{M}) - \frac{1}{m} \sum_{i=1}^m \log \max \{ \epsilon', \nu'(\mathbf{x}_i) - \text{div}_E \mathbf{u}'(\mathbf{x}_i) \} \\ &\quad + \frac{\lambda_-}{l} \sum_{j=1}^l \left( \epsilon' - \min \{ \epsilon', \nu'(\mathbf{y}_j) - \text{div}_E \mathbf{u}'(\mathbf{y}_j) \} \right), \end{aligned}$$

where  $\nu' = V(\mathcal{M})\nu \equiv 1$ ,  $\mathbf{u}' = V(\mathcal{M})\mathbf{u}$ ,  $\epsilon' = V(\mathcal{M})\epsilon$ , and  $\log V(\mathcal{M})$  is a constant. Lastly note that the definition of  $\mathbf{v}_i$  is invariant to this scaling and can be computed with the unnormalized quantities.

## F Additional Experimental Details

We used an internal academic cluster with NVIDIA Quadro RTX 6000 GPUs. Every run and seed configuration required 1 GPU. All other experimental details are mentioned in the main paper. Our codebase, implemented in PyTorch, is attached in the supplementary materials. We will open-source it post the review process.

## References

- Botsch, M., Kobbelt, L., Pauly, M., Alliez, P., and Lévy, B. (2010). *Polygon mesh processing*. CRC press.
- Do Carmo, M. P. (2016). *Differential geometry of curves and surfaces: revised and updated second edition*. Courier Dover Publications.
- Hornik, K., Stinchcombe, M., and White, H. (1990). Universal approximation of an unknown mapping and its derivatives using multilayer feedforward networks. *Neural networks*, 3(5):551–560.
- Lang, S. (2012). *Fundamentals of differential geometry*, volume 191. Springer Science & Business Media.
- Lee, J. M. (2013). Smooth manifolds. In *Introduction to Smooth Manifolds*, pages 1–31. Springer.
- Morita, S. (2001). *Geometry of differential forms*. Number 201. American Mathematical Soc.
- Moser, J. (1965). On the volume elements on a manifold. *Transactions of the American Mathematical Society*, 120(2):286–294.

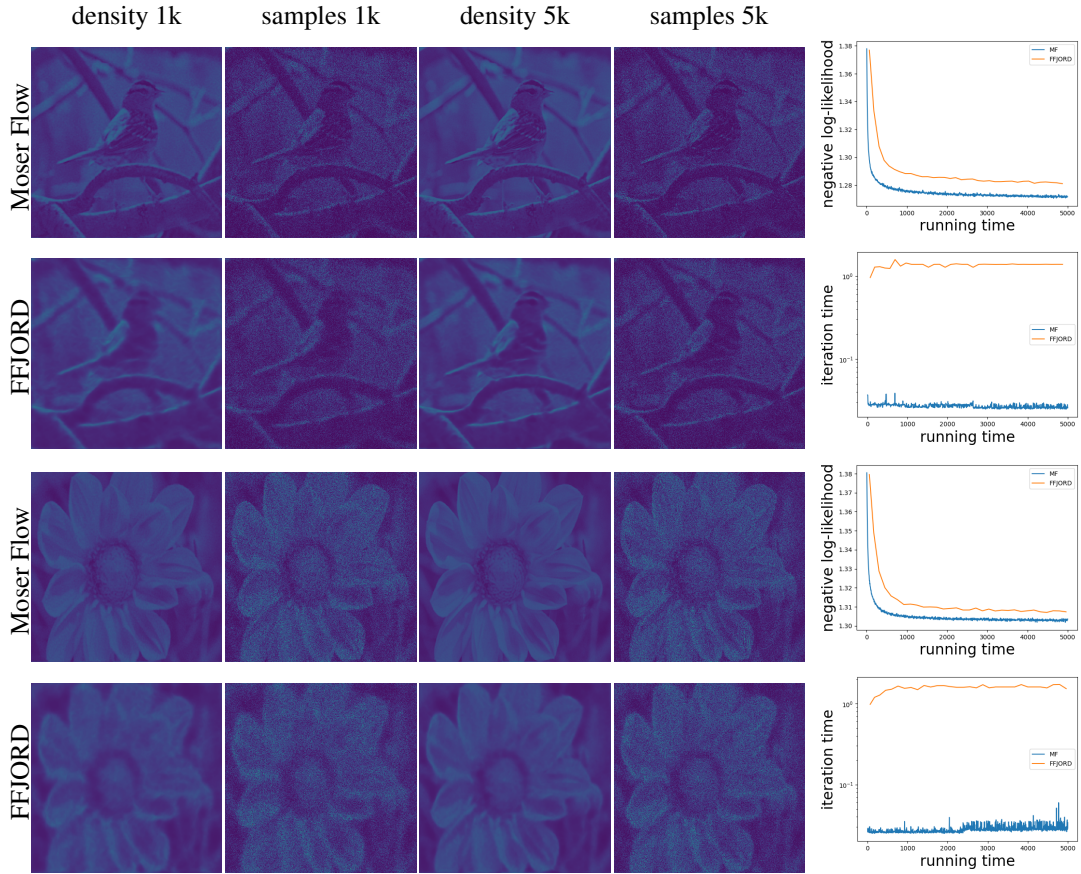

Figure A1: Comparing learned density and generated samples with MF and FFIORD at different times (in k-sec); top right shows NLL scores for both MF and FFIORD at different times; bottom right shows time per iteration (in log-scale, sec) as a function of total running time (in sec); FFIORD iterations take longer as training progresses. Flickr images (license CC BY 2.0): Bird by Flickr user "lakeworth" <https://www.flickr.com/photos/lakeworth/46657879995/>; Flower by Flickr user "daiyaan.db" <https://www.flickr.com/photos/daiyaandb/23279986094/>.
